# Supplementary material for: Discovery of New Candidate Genes Related to Brain Development Using Protein Interaction Information
Source: PubMed Central journal article supplement (PMC4311913; doi:10.1371/journal.pone.0118003), 2015-01-30
Supplement: pone.0118003.s001.pdf [file pone.0118003.s001.pdf]

**S1 File.** 94 human genes related to brain development, which are with experimental evidence from Gene Ontology (GO:0007420)

SHROOM4  
ROBO1  
NDE1  
GPR56  
NPY  
ZNF148  
SYNGR3  
SRGAP2C  
NDUFS4  
ROBO2  
ZIC1  
BASP1  
SALL1  
CTNS  
LAMB1  
SMARCA1  
CNTNAP2  
PADI2  
GNB4  
TTBK1  
BPTF  
POTEE  
NDRG2  
DYNLL1  
WDR62  
EOMES  
ATP5J  
SEMA3A  
MAG  
SEC16A  
MBP  
PTF1A  
WNT7B  
CNP  
HSPA5  
WNT2B  
G6PD  
RHOA  
S100A1  
COX6B1  
COL4A1

LRRK2  
WNT7A  
SZT2  
ZNF335  
H2BFS  
PTPN11  
BMP4  
BMP2  
SUDS3  
SYPL2  
ENO3  
YWHAQ  
MAOB  
LDHA  
ASCL1  
CKB  
MAPKAP1  
NOG  
NKX2-1  
SLC6A4  
FOXP2  
CCDC14  
SLIT2  
AQP1  
GLUD1  
PROX1  
CDC42  
DSCAML1  
H2AFY2  
PAFAH1B1  
INA  
ACTB  
RAD1  
ABCB6  
VCX3A  
YWHAH  
FGF9  
PLP1  
GSK3B  
SIRT2  
CASP5  
RAB3GAP1  
ZNF430  
CLN5

NDUFS3  
PPT1  
ATP5F1  
SLIT3  
SLIT1  
SOX2  
YWHAE  
CALM1  
NIPBL
