# Supplementary material for: Discovery of New Candidate Genes Related to Brain Development Using Protein Interaction Information
Source: PubMed Central journal article supplement (PMC4311913; doi:10.1371/journal.pone.0118003), 2015-01-30
Supplement: pone.0118003.s002.pdf [file pone.0118003.s002.pdf]

**S2 File.** 516 human genes related to brain development, which are with evidence, instead of experimental evidence, from Gene Ontology (GO:0007420)

ABR  
AK2  
AK4  
AK7  
AK8  
APP  
ARX  
ATM  
AXL  
BAX  
BCR  
BID  
BOK  
CBS  
CD9  
CRH  
CSK  
DCT  
DCX  
EGF  
EN1  
EN2  
FYN  
GSC  
HTT  
ID2  
ID4  
MDK  
MET  
NES  
NF1  
OTP  
RAX  
RYK  
SCT  
SHH  
SKI  
SMO  
SRC  
SRF  
SRR

TH  
TNR  
AARS  
AATK  
ACAT1  
ACSL3  
ADCYAP1  
AFF2  
AGTPBP1  
AGTR2  
AHI1  
ALDH1A2  
ALDH1A3  
ALX1  
APAF1  
APLP1  
APLP2  
APOD  
ARCN1  
ARF4  
ARID1A  
ARL13B  
ARRB2  
ASPM  
ATF5  
ATG7  
ATIC  
ATOH1  
ATP2B2  
ATP7A  
ATRN  
ATRX  
ATXN2  
AVPR1A  
AVPR2  
AXIN1  
BAG3  
BAG6  
BAK1  
BARHL1  
BBS2  
BBS4  
BBS7  
BCAN

BCL11B  
BCL2  
BCL2L11  
BDH1  
BHLHE22  
BMPR1A  
BMPR2  
BRCA2  
BTBD3  
BTG2  
C2CD3  
C5AR1  
CA10  
CACNA1A  
CADM1  
CADM2  
CASP2  
CBLN1  
CCDC85C  
CCKAR  
CCNG1  
CDH1  
CDH2  
CDK5  
CDK5R1  
CDK5R2  
CDK6  
CDON  
CELSR2  
CEND1  
CEP120  
CEP290  
CHD5  
CHR1  
CHRNA2  
CITED1  
CMA1  
CNTN1  
CNTN2  
CNTN4  
COL3A1  
COX17  
CREB1  
CRHR1

CTNNA2  
CTNNB1  
CTNND1  
CTTNBP2  
CX3CR1  
CXCL12  
CXCR2  
CXCR4  
CYP11A1  
CYP17A1  
DAB1  
DAB2IP  
DCLK1  
DDIT4  
DFFB  
DICER1  
DISC1  
DIXDC1  
DKK1  
DLC1  
DLX1  
DLX2  
DMBX1  
DPCD  
DPYSL2  
DRAXIN  
DRD1  
DRD2  
DUOX2  
DVL2  
DYNC2H1  
E2F1  
ECE2  
EFNA2  
EGFR  
EGR2  
EMX1  
EMX2  
EPHA5  
EPHA7  
EPHB2  
EPHB3  
EPOR  
ERBB4

ESR2  
ETS1  
EVI1  
EXT1  
EZH2  
FABP7  
FAIM2  
FAT4  
FEZF1  
FEZF2  
FGF10  
FGF13  
FGF2  
FGF8  
FGFR1  
FGFR2  
FGFR3  
FOXA2  
FOXB1  
FOXC1  
FOXG1  
FOXJ1  
FOXL1  
FPGS  
FRS2  
FRZB  
FZD1  
FZD10  
FZD2  
FZD3  
FZD4  
FZD5  
FZD6  
FZD7  
FZD8  
FZD9  
GABRA5  
GART  
GAS1  
GATA2  
GBX2  
GDF7  
GDPD5  
GHRH

GHRHR  
GLI1  
GLI2  
GLI3  
GNAO1  
GNAQ  
GNG12  
GNPAT  
GRID2  
GRIN1  
GSX1  
GSX2  
H3F3A  
H3F3B  
HAP1  
HDAC2  
HERC1  
HES1  
HES3  
HES5  
HESX1  
HHEX  
HIF1A  
HMGA2  
HMGCS1  
HMX2  
HMX3  
HNF1B  
HNMT  
HOOK3  
HOXA1  
HOXA2  
HOXB1  
HOXB2  
HOXB3  
HPRT1  
HRH3  
HSPG2  
HTR5A  
HTR6  
HTRA2  
IFT88  
IGF1  
IGF1R

IKZF1  
IRS2  
ISL1  
ITGA8  
ITGB1  
KAT2A  
KCNK3  
KDM1A  
KDM2B  
KDM7A  
KIF27  
KIRREL3  
KLHL1  
KLHL17  
KNDC1  
LDB1  
LEF1  
LHX1  
LHX2  
LHX3  
LHX5  
LHX6  
LHX8  
LMX1A  
LMX1B  
LRP2  
LRP6  
LRP8  
MACROD2  
MAFB  
MAP1S  
MAS1  
MBOAT7  
MDGA1  
MECOM  
MECP2  
MED1  
MEF2A  
MEF2C  
MEN1  
MKKS  
MNAT1  
MSX1  
MTPN

MYH10  
MYO16  
NAGLU  
NAPA  
NCOA1  
NCOA6  
NCOR1  
NCOR2  
NDEL1  
NDST1  
NEURL1  
NEUROD1  
NEUROD2  
NEUROD6  
NEUROG2  
NEUROG3  
NFIB  
NFIK  
NKX2-2  
NKX2-6  
NLGN4X  
NME1  
NME5  
NME7  
NNAT  
NODAL  
NOTCH1  
NOTCH3  
NR0B1  
NR2C2  
NR2E1  
NR2F1  
NR2F2  
NR4A2  
NR4A3  
NRXN1  
NTF3  
NTRK2  
NUMB  
NUMBL  
OGDH  
OLIG2  
OTX1  
OTX2



OXCT1  
OXTR  
P2RY1  
PAX2  
PAX6  
PCDH18  
PCDH9  
PCM1  
PCNT  
PEX13  
PEX5  
PFDN1  
PGAP1  
PHF8  
PHGDH  
PHLDA1  
PHOX2A  
PHOX2B  
PITPNM1  
PITX1  
PITX2  
PITX3  
PLCB1  
PLXNA2  
PLXNA3  
PLXNA4  
PLXNB2  
POMK  
POU1F1  
POU3F1  
POU3F2  
POU3F3  
POU3F4  
POU4F1  
POU6F1  
PRDM8  
PRKDC  
PRKG1  
PROP1  
PSEN1  
PSEN2  
PTCH1  
PTEN  
PTPRG

PTPRS  
PYGO2  
RAB18  
RAC1  
RALDH2  
RAPGEF2  
RARB  
RBFox2  
RBPJ  
RELN  
RFX4  
RORA  
RRM1  
RTN4  
S1PR1  
SALL3  
SCN5A  
SDF4  
SEMA4C  
SEMA5A  
SEMA6D  
SEPP1  
SEPT4  
SETD2  
SEZ6  
SEZ6L  
SEZ6L2  
SFRP1  
SFRP2  
SFRP4  
SFRP5  
SHANK3  
SHARPIN  
SHROOM2  
SIX3  
SKOR2  
SLC1A2  
SLC23A1  
SLC4A7  
SLC6A11  
SLC6A3  
SLC7A11  
SLC8A3  
SLITRK5

SMAD1  
SMAD9  
SMARCA4  
SNPH  
SOX1  
SOX3  
SPEF2  
SPHK1  
SPHK2  
SPTBN2  
SRGAP2  
SSBP3  
SSTR1  
SSTR2  
SSTR3  
SSTR4  
STAR  
STIL  
STK36  
TACC1  
TACC2  
TACC3  
TAL2  
TBR1  
TBX19  
TBX3  
TCF7  
TCF7L1  
TCF7L2  
TCTN1  
TFAP2A  
TFAP2C  
TFAP2D  
TGFBR2  
TMEM57  
TOP2B  
TP73  
TRNP1  
TSC1  
TSKU  
TSPAN2  
TTC8  
TULP3  
TWSG1

TYRO3  
UBE3A  
UCHL5  
ULK1  
ULK4  
UNC5C  
UNCX  
UQCRQ  
UTP3  
VAX1  
VAX2  
WNT1  
WNT3A  
WNT4  
WNT5A  
XRCC1  
XRCC5  
XRCC6  
ZBTB18  
ZEB1  
ZEB2  
ZFHX3  
ZIC2  
ZIC5  
ARHGAP35  
ATP6V0D1  
CDK5RAP1  
CDK5RAP2  
CDK5RAP3  
MAPK8IP3  
PAFAH1B2  
PAFAH1B3  
RPGRIPL  
SERPINE2  
DKFZp686L0365
