# Supplementary material for: Discovery of New Candidate Genes Related to Brain Development Using Protein Interaction Information
Source: PubMed Central journal article supplement (PMC4311913; doi:10.1371/journal.pone.0118003), 2015-01-30
Supplement: pone.0118003.s003.pdf [file pone.0118003.s003.pdf]

**S1 Table.** 382 candidate genes for brain development and their betweenness and permutation FDRs.

| <b>Ensembl ID of genes</b> | <b>Gene name</b> | <b>Betweenness</b> | <b>Permutation FDR</b> |
|----------------------------|------------------|--------------------|------------------------|
| ENSP00000241651            | MYOG             | 88                 | 0                      |
| ENSP00000245960            | CDC25B           | 38                 | 0                      |
| ENSP00000247182            | SIX1             | 88                 | 0                      |
| ENSP00000248150            | GNG13            | 84                 | 0                      |
| ENSP00000253408            | GFAP             | 88                 | 0                      |
| ENSP00000261937            | FLT4             | 88                 | 0                      |
| ENSP00000261951            | CNOT6            | 88                 | 0                      |
| ENSP00000263094            | ABCA7            | 88                 | 0                      |
| ENSP00000267859            | BNIP2            | 133                | 0                      |
| ENSP00000269280            | NLRP1            | 88                 | 0                      |
| ENSP00000282588            | ITGA1            | 88                 | 0                      |
| ENSP00000284440            | UCHL1            | 88                 | 0                      |
| ENSP00000287934            | FZD1             | 88                 | 0                      |
| ENSP00000290663            | MED8             | 88                 | 0                      |
| ENSP00000300619            | ZNF91            | 88                 | 0                      |
| ENSP00000301464            | IGFBP6           | 88                 | 0                      |
| ENSP00000318195            | NCL              | 174                | 0                      |
| ENSP00000344666            | NF2              | 88                 | 0                      |
| ENSP00000347198            | SRGAP1           | 339                | 0                      |

|                 |          |     |       |
|-----------------|----------|-----|-------|
| ENSP00000351832 | RAB3GAP2 | 88  | 0     |
| ENSP00000357393 | EFNA3    | 88  | 0     |
| ENSP00000359151 | DBT      | 88  | 0     |
| ENSP00000362592 | RBBP4    | 179 | 0     |
| ENSP00000363826 | FZD8     | 88  | 0     |
| ENSP00000366413 | POU4F1   | 88  | 0     |
| ENSP00000370445 | HTN3     | 88  | 0     |
| ENSP00000175506 | ASNS     | 88  | 0.002 |
| ENSP00000224237 | VIM      | 88  | 0.002 |
| ENSP00000229195 | CNOT2    | 88  | 0.002 |
| ENSP00000311360 | RAD9A    | 88  | 0.002 |
| ENSP00000329623 | BCL2     | 570 | 0.002 |
| ENSP00000349959 | RICTOR   | 88  | 0.002 |
| ENSP00000354478 | DLX1     | 88  | 0.002 |
| ENSP00000354720 | SMC3     | 88  | 0.002 |
| ENSP00000373715 | DCP2     | 97  | 0.002 |
| ENSP00000410076 | CASP1    | 88  | 0.002 |
| ENSP00000260810 | TOPBP1   | 88  | 0.004 |
| ENSP00000296930 | NPM1     | 174 | 0.004 |
| ENSP00000307235 | EIF2AK3  | 88  | 0.004 |
| ENSP00000320949 | CNOT1    | 88  | 0.004 |
| ENSP00000330633 | CNTN2    | 88  | 0.004 |

|                 |         |     |       |
|-----------------|---------|-----|-------|
| ENSP00000340820 | MAPT    | 94  | 0.004 |
| ENSP00000341551 | SMAD4   | 415 | 0.004 |
| ENSP00000354511 | COMT    | 88  | 0.004 |
| ENSP00000354673 | CNOT4   | 88  | 0.004 |
| ENSP00000370421 | PDX1    | 88  | 0.004 |
| ENSP00000381717 | UBE2D2  | 88  | 0.004 |
| ENSP00000403721 | CYP21A2 | 88  | 0.004 |
| ENSP00000255764 | MED10   | 88  | 0.006 |
| ENSP00000262030 | ATP5B   | 168 | 0.006 |
| ENSP00000263923 | KDR     | 98  | 0.006 |
| ENSP00000280193 | VEGFC   | 62  | 0.006 |
| ENSP00000312122 | SEC13   | 88  | 0.006 |
| ENSP00000355370 | CNTF    | 88  | 0.006 |
| ENSP00000280665 | DCP1B   | 42  | 0.008 |
| ENSP00000301587 | ATP5H   | 6   | 0.008 |
| ENSP00000320147 | EZH2    | 88  | 0.008 |
| ENSP00000321999 | PTH1R   | 15  | 0.008 |
| ENSP00000219548 | STUB1   | 3   | 0.01  |
| ENSP00000265371 | NRP1    | 88  | 0.01  |
| ENSP00000315774 | NDUFS8  | 1   | 0.01  |
| ENSP00000317159 | CYC1    | 252 | 0.01  |
| ENSP00000352608 | RYR1    | 175 | 0.01  |

|                 |        |     |       |
|-----------------|--------|-----|-------|
| ENSP00000354554 | MT-CYB | 88  | 0.01  |
| ENSP00000354876 | MT-CO2 | 88  | 0.01  |
| ENSP00000307786 | CYCS   | 250 | 0.012 |
| ENSP00000230538 | LAMA4  | 64  | 0.014 |
| ENSP00000336790 | ATF4   | 168 | 0.014 |
| ENSP00000396219 | MEF2C  | 88  | 0.014 |
| ENSP00000281821 | EPHA4  | 88  | 0.016 |
| ENSP00000305769 | SMAD1  | 252 | 0.016 |
| ENSP00000354859 | DRD2   | 6   | 0.016 |
| ENSP00000371138 | FKBP1A | 186 | 0.016 |
| ENSP00000264606 | HDAC4  | 9   | 0.018 |
| ENSP00000353059 | APAF1  | 250 | 0.018 |
| ENSP00000237527 | GHRH   | 4   | 0.02  |
| ENSP00000263253 | EP300  | 740 | 0.02  |
| ENSP00000297904 | FIGF   | 3   | 0.02  |
| ENSP00000309103 | BAD    | 160 | 0.02  |
| ENSP00000320171 | PKM    | 69  | 0.02  |
| ENSP00000354607 | FZD5   | 87  | 0.02  |
| ENSP00000367207 | MYC    | 289 | 0.022 |
| ENSP00000370938 | CDK8   | 88  | 0.022 |
| ENSP00000262160 | SMAD2  | 358 | 0.024 |
| ENSP00000261349 | LRP6   | 174 | 0.026 |

|                 |         |     |       |
|-----------------|---------|-----|-------|
| ENSP00000264951 | XRN1    | 195 | 0.028 |
| ENSP00000320180 | GHRHR   | 2   | 0.03  |
| ENSP00000356016 | CR1     | 88  | 0.03  |
| ENSP00000415941 | C4B     | 88  | 0.03  |
| ENSP00000234590 | ENO1    | 68  | 0.032 |
| ENSP00000342307 | FOXM1   | 64  | 0.032 |
| ENSP00000348877 | GPI     | 88  | 0.032 |
| ENSP00000363193 | MED12   | 1   | 0.032 |
| ENSP00000316032 | NUP98   | 88  | 0.034 |
| ENSP00000379213 | PTHLH   | 5   | 0.034 |
| ENSP00000229264 | GNB3    | 84  | 0.038 |
| ENSP00000297338 | RAD21   | 5   | 0.038 |
| ENSP00000223023 | WASL    | 120 | 0.04  |
| ENSP00000245323 | EFNB2   | 88  | 0.04  |
| ENSP00000264039 | GPC1    | 1   | 0.04  |
| ENSP00000309871 | RACGAP1 | 21  | 0.044 |
| ENSP00000313950 | AURKB   | 88  | 0.044 |
| ENSP00000323421 | SMC1A   | 83  | 0.044 |
| ENSP00000353622 | SIN3A   | 88  | 0.046 |
| ENSP00000176195 | SCT     | 147 | 0.048 |
| ENSP00000395498 | PAX8    | 86  | 0.048 |
| ENSP00000400365 | LAMA2   | 24  | 0.048 |

|                 |        |     |       |
|-----------------|--------|-----|-------|
| ENSP00000400591 | SNRPE  | 207 | 0.048 |
| ENSP00000264634 | WNT5A  | 87  | 0.05  |
| ENSP00000295731 | IHH    | 5   | 0.05  |
| ENSP00000352264 | CD2AP  | 2   | 0.05  |
| ENSP00000297261 | SHH    | 91  | 0.054 |
| ENSP00000361125 | VEGFA  | 122 | 0.054 |
| ENSP00000318351 | BCKDHB | 88  | 0.056 |
| ENSP00000227378 | HSPA8  | 95  | 0.058 |
| ENSP00000270349 | SLC6A3 | 6   | 0.058 |
| ENSP00000228872 | CDKN1B | 134 | 0.06  |
| ENSP00000262187 | RHEB   | 3   | 0.06  |
| ENSP00000271555 | MEF2D  | 10  | 0.06  |
| ENSP00000236850 | APOA1  | 88  | 0.064 |
| ENSP00000250448 | FOXA1  | 1   | 0.064 |
| ENSP00000256383 | EIF2S1 | 88  | 0.064 |
| ENSP00000357625 | BNIP3  | 88  | 0.064 |
| ENSP00000364133 | TGFBR1 | 88  | 0.064 |
| ENSP00000378338 | GIT1   | 19  | 0.064 |
| ENSP00000263360 | EED    | 4   | 0.066 |
| ENSP00000261023 | ITGAV  | 54  | 0.068 |
| ENSP00000007722 | ITGA3  | 6   | 0.07  |
| ENSP00000227667 | APOC3  | 54  | 0.07  |

|                 |         |     |       |
|-----------------|---------|-----|-------|
| ENSP00000245907 | C3      | 88  | 0.07  |
| ENSP00000252102 | NDUFA2  | 174 | 0.07  |
| ENSP00000268182 | IQGAP1  | 154 | 0.07  |
| ENSP00000222330 | GSK3A   | 6   | 0.074 |
| ENSP00000244007 | PLCG1   | 113 | 0.074 |
| ENSP00000332353 | PTCH1   | 5   | 0.074 |
| ENSP00000344352 | ATF3    | 167 | 0.074 |
| ENSP00000380280 | FGFR1   | 152 | 0.076 |
| ENSP00000247170 | DAAM1   | 1   | 0.08  |
| ENSP00000319664 | NUDC    | 141 | 0.082 |
| ENSP00000392423 | RELN    | 8   | 0.082 |
| ENSP00000302665 | IGF1    | 88  | 0.084 |
| ENSP00000356024 | CR2     | 88  | 0.084 |
| ENSP00000278616 | ATM     | 83  | 0.086 |
| ENSP00000338072 | AVPR2   | 85  | 0.086 |
| ENSP00000355537 | ACTN2   | 89  | 0.086 |
| ENSP00000243050 | NR4A1   | 135 | 0.088 |
| ENSP00000351407 | ARNT    | 69  | 0.09  |
| ENSP00000278568 | PAK1    | 50  | 0.094 |
| ENSP00000388107 | UBA52   | 88  | 0.094 |
| ENSP00000302269 | VAV1    | 132 | 0.096 |
| ENSP00000364893 | ARHGEF7 | 56  | 0.096 |

|                 |          |     |       |
|-----------------|----------|-----|-------|
| ENSP00000282397 | FLT1     | 3   | 0.098 |
| ENSP00000298552 | TSC1     | 51  | 0.098 |
| ENSP00000338799 | IL6ST    | 89  | 0.098 |
| ENSP00000254976 | SNAP25   | 88  | 0.104 |
| ENSP00000344822 | S100A13  | 4   | 0.104 |
| ENSP00000364094 | ITGB1    | 109 | 0.106 |
| ENSP00000303634 | LRP8     | 4   | 0.108 |
| ENSP00000351665 | CLIP1    | 14  | 0.108 |
| ENSP00000365891 | WAS      | 22  | 0.11  |
| ENSP00000256442 | CCNB1    | 52  | 0.112 |
| ENSP00000280357 | IL18     | 88  | 0.112 |
| ENSP00000379933 | TPI1     | 87  | 0.112 |
| ENSP00000309597 | MAP3K11  | 5   | 0.114 |
| ENSP00000354687 | MT-ND1   | 2   | 0.114 |
| ENSP00000363708 | BMPR2    | 2   | 0.116 |
| ENSP00000261205 | SYT1     | 4   | 0.12  |
| ENSP00000414006 | LSM2     | 19  | 0.12  |
| ENSP00000241014 | MAPK8IP1 | 5   | 0.122 |
| ENSP00000260402 | PLCB2    | 4   | 0.122 |
| ENSP00000264708 | POMC     | 160 | 0.122 |
| ENSP00000299293 | FRS2     | 78  | 0.122 |
| ENSP00000345571 | E2F1     | 96  | 0.122 |



|                 |          |     |       |
|-----------------|----------|-----|-------|
| ENSP00000358622 | IKBKG    | 88  | 0.124 |
| ENSP00000287820 | PPARG    | 86  | 0.126 |
| ENSP00000310491 | ARHGAP1  | 16  | 0.126 |
| ENSP00000338018 | HIF1A    | 261 | 0.126 |
| ENSP00000379204 | BMP7     | 62  | 0.128 |
| ENSP00000360141 | GNAS     | 84  | 0.13  |
| ENSP00000256897 | CCNH     | 23  | 0.134 |
| ENSP00000301633 | BIRC5    | 72  | 0.138 |
| ENSP00000348708 | UPF2     | 49  | 0.138 |
| ENSP00000360286 | RAE1     | 36  | 0.138 |
| ENSP00000300651 | MED1     | 64  | 0.14  |
| ENSP00000215832 | MAPK1    | 199 | 0.142 |
| ENSP00000312987 | HNF4A    | 6   | 0.142 |
| ENSP00000298171 | TSHR     | 1   | 0.144 |
| ENSP00000362413 | PGK1     | 87  | 0.144 |
| ENSP00000358918 | SUFU     | 1   | 0.148 |
| ENSP00000229022 | VDR      | 63  | 0.15  |
| ENSP00000229239 | GAPDH    | 87  | 0.15  |
| ENSP00000264867 | PPARGC1A | 66  | 0.152 |
| ENSP00000363019 | UBE2D1   | 14  | 0.154 |
| ENSP00000264246 | CD80     | 4   | 0.158 |
| ENSP00000297518 | CDK5     | 10  | 0.16  |

|                 |        |     |       |
|-----------------|--------|-----|-------|
| ENSP00000354923 | DMD    | 2   | 0.16  |
| ENSP00000302160 | LSM3   | 7   | 0.162 |
| ENSP00000313419 | CD19   | 88  | 0.166 |
| ENSP00000363804 | KLF4   | 6   | 0.166 |
| ENSP00000310596 | LSM1   | 41  | 0.168 |
| ENSP00000216911 | AURKA  | 29  | 0.174 |
| ENSP00000258682 | CAMK2B | 124 | 0.174 |
| ENSP00000333001 | RBM8A  | 8   | 0.174 |
| ENSP00000399968 | NCOA2  | 80  | 0.176 |
| ENSP00000267163 | RB1    | 120 | 0.178 |
| ENSP00000263754 | KAT2B  | 30  | 0.18  |
| ENSP00000282091 | PTH    | 81  | 0.182 |
| ENSP00000317714 | STX4   | 3   | 0.184 |
| ENSP00000332049 | CD86   | 12  | 0.19  |
| ENSP00000363827 | HSPG2  | 1   | 0.19  |
| ENSP00000261396 | NUP133 | 52  | 0.192 |
| ENSP00000276201 | UPF3B  | 8   | 0.192 |
| ENSP00000368169 | DVL1   | 86  | 0.194 |
| ENSP00000278916 | CHEK1  | 100 | 0.198 |
| ENSP00000300161 | YWHAB  | 1   | 0.198 |
| ENSP00000354621 | SMURF1 | 7   | 0.206 |
| ENSP00000262077 | NUP153 | 52  | 0.208 |

|                 |        |     |       |
|-----------------|--------|-----|-------|
| ENSP00000262320 | AXIN1  | 69  | 0.208 |
| ENSP00000324890 | CD28   | 16  | 0.208 |
| ENSP00000338345 | SNCA   | 201 | 0.208 |
| ENSP00000354586 | GLI2   | 6   | 0.208 |
| ENSP00000233242 | APOB   | 15  | 0.212 |
| ENSP00000257408 | KLB    | 1   | 0.214 |
| ENSP00000290158 | KPNB1  | 27  | 0.218 |
| ENSP00000369050 | CYP1A1 | 84  | 0.222 |
| ENSP00000338934 | EZR    | 4   | 0.224 |
| ENSP00000279593 | GRIN2B | 95  | 0.244 |
| ENSP00000237837 | FGF23  | 1   | 0.246 |
| ENSP00000331746 | CALCA  | 61  | 0.246 |
| ENSP00000302564 | BCL2L1 | 8   | 0.25  |
| ENSP00000320935 | SLC2A4 | 3   | 0.25  |
| ENSP00000304895 | IRS1   | 136 | 0.258 |
| ENSP00000321797 | FGF8   | 70  | 0.258 |
| ENSP00000354558 | MTOR   | 123 | 0.258 |
| ENSP00000292408 | FGFR4  | 2   | 0.266 |
| ENSP00000229135 | IFNG   | 73  | 0.272 |
| ENSP00000333982 | NDEL1  | 10  | 0.272 |
| ENSP00000363868 | ABCA1  | 13  | 0.278 |
| ENSP00000352561 | CALCR  | 61  | 0.28  |

|                 |          |      |       |
|-----------------|----------|------|-------|
| ENSP00000361275 | PLK3     | 36   | 0.28  |
| ENSP00000252444 | LDLR     | 15   | 0.282 |
| ENSP00000312435 | DAG1     | 24   | 0.284 |
| ENSP00000354791 | DCTN1    | 14   | 0.284 |
| ENSP00000262613 | SLC9A3R1 | 175  | 0.288 |
| ENSP00000312995 | CLSPN    | 19   | 0.288 |
| ENSP00000177694 | TBX21    | 9    | 0.298 |
| ENSP00000332973 | SMAD3    | 47   | 0.304 |
| ENSP00000312652 | LEP      | 177  | 0.306 |
| ENSP00000294172 | NXF1     | 41   | 0.308 |
| ENSP00000267996 | TPM1     | 19   | 0.31  |
| ENSP00000270202 | AKT1     | 437  | 0.316 |
| ENSP00000325690 | CARM1    | 7    | 0.326 |
| ENSP00000212015 | SIRT1    | 66   | 0.328 |
| ENSP00000352400 | NUP214   | 38   | 0.328 |
| ENSP00000250003 | MYOD1    | 82   | 0.33  |
| ENSP00000368880 | FOXO1    | 3    | 0.33  |
| ENSP00000387662 | GCG      | 151  | 0.332 |
| ENSP00000419692 | RXRA     | 21   | 0.344 |
| ENSP00000348986 | INS-IGF2 | 122  | 0.346 |
| ENSP00000242057 | AHR      | 15   | 0.36  |
| ENSP00000269305 | TP53     | 1340 | 0.362 |

|                 |         |     |       |
|-----------------|---------|-----|-------|
| ENSP00000219476 | TSC2    | 25  | 0.366 |
| ENSP00000330237 | CASP9   | 1   | 0.368 |
| ENSP00000256443 | CDK7    | 14  | 0.37  |
| ENSP00000339527 | FOXO3   | 14  | 0.37  |
| ENSP00000302486 | MAP2K1  | 14  | 0.376 |
| ENSP00000356713 | IFNGR1  | 8   | 0.376 |
| ENSP00000313829 | KHDRBS1 | 1   | 0.382 |
| ENSP00000344115 | CDH5    | 6   | 0.384 |
| ENSP00000283635 | CD8A    | 88  | 0.386 |
| ENSP00000380921 | SH3KBP1 | 30  | 0.39  |
| ENSP00000303830 | INSR    | 24  | 0.392 |
| ENSP00000365016 | IRS2    | 3   | 0.392 |
| ENSP00000226218 | SEBOX   | 1   | 0.398 |
| ENSP00000261799 | PDGFRB  | 130 | 0.4   |
| ENSP00000362649 | HDAC1   | 156 | 0.4   |
| ENSP00000321656 | CDC25C  | 145 | 0.402 |
| ENSP00000346300 | CRKL    | 8   | 0.402 |
| ENSP00000338548 | FGF1    | 4   | 0.404 |
| ENSP00000380227 | ITGA4   | 90  | 0.414 |
| ENSP00000387699 | CREB1   | 118 | 0.414 |
| ENSP00000398597 | EXOSC6  | 4   | 0.414 |
| ENSP00000274255 | SKP2    | 11  | 0.418 |

|                 |          |     |       |
|-----------------|----------|-----|-------|
| ENSP00000300093 | PLK1     | 143 | 0.426 |
| ENSP00000361626 | YBX1     | 113 | 0.43  |
| ENSP00000254227 | NR0B2    | 8   | 0.434 |
| ENSP00000358997 | IRAK1    | 12  | 0.442 |
| ENSP00000264033 | CBL      | 150 | 0.444 |
| ENSP00000302967 | HDAC3    | 2   | 0.444 |
| ENSP00000357656 | FYN      | 100 | 0.444 |
| ENSP00000211998 | VCL      | 16  | 0.45  |
| ENSP00000316460 | FYB      | 2   | 0.452 |
| ENSP00000306512 | IL8      | 3   | 0.458 |
| ENSP00000353483 | MAPK8    | 134 | 0.458 |
| ENSP00000340691 | EIF4EBP1 | 2   | 0.46  |
| ENSP00000359424 | CHUK     | 14  | 0.46  |
| ENSP00000268035 | IGF1R    | 29  | 0.462 |
| ENSP00000343204 | JAK1     | 8   | 0.464 |
| ENSP00000299421 | ILK      | 14  | 0.466 |
| ENSP00000216160 | TAB1     | 1   | 0.47  |
| ENSP00000347858 | XIAP     | 1   | 0.47  |
| ENSP00000252486 | APOE     | 69  | 0.472 |
| ENSP00000274376 | RASA1    | 4   | 0.472 |
| ENSP00000329357 | SP1      | 106 | 0.474 |
| ENSP00000274026 | CCNA2    | 48  | 0.478 |

|                 |        |     |       |
|-----------------|--------|-----|-------|
| ENSP00000280892 | EIF4E  | 7   | 0.478 |
| ENSP00000341189 | PTK2   | 78  | 0.48  |
| ENSP00000264972 | ZAP70  | 3   | 0.484 |
| ENSP00000348551 | NCOR2  | 1   | 0.488 |
| ENSP00000354394 | STAT1  | 64  | 0.488 |
| ENSP00000348461 | RAC1   | 248 | 0.492 |
| ENSP00000266970 | CDK2   | 39  | 0.498 |
| ENSP00000252622 | LSM7   | 9   | 0.5   |
| ENSP00000228307 | PXN    | 102 | 0.502 |
| ENSP00000355865 | PARK2  | 100 | 0.502 |
| ENSP00000274335 | PIK3R1 | 9   | 0.504 |
| ENSP00000351273 | CASP8  | 4   | 0.504 |
| ENSP00000283195 | RANBP2 | 27  | 0.506 |
| ENSP00000251849 | RAF1   | 53  | 0.522 |
| ENSP00000221494 | SF3A2  | 223 | 0.54  |
| ENSP00000215829 | SNRPD3 | 16  | 0.544 |
| ENSP00000348827 | THRB   | 1   | 0.544 |
| ENSP00000262158 | SMAD7  | 2   | 0.546 |
| ENSP00000309503 | YWHAZ  | 36  | 0.576 |
| ENSP00000264657 | STAT3  | 333 | 0.58  |
| ENSP00000226730 | IL2    | 101 | 0.582 |
| ENSP00000216797 | NFKBIA | 39  | 0.586 |

|                 |         |     |       |
|-----------------|---------|-----|-------|
| ENSP00000326804 | CUL1    | 7   | 0.586 |
| ENSP00000263341 | IL1B    | 15  | 0.588 |
| ENSP00000356346 | PTPRC   | 18  | 0.59  |
| ENSP00000263967 | PIK3CA  | 4   | 0.594 |
| ENSP00000257904 | CDK4    | 2   | 0.596 |
| ENSP00000003084 | CFTR    | 85  | 0.6   |
| ENSP00000330393 | LEPR    | 6   | 0.6   |
| ENSP00000361021 | PTEN    | 55  | 0.608 |
| ENSP00000221930 | TGFB1   | 29  | 0.61  |
| ENSP00000304903 | CD2BP2  | 110 | 0.612 |
| ENSP00000269321 | ARHGDI1 | 77  | 0.614 |
| ENSP00000222812 | STX1A   | 81  | 0.618 |
| ENSP00000339007 | GRB2    | 394 | 0.634 |
| ENSP00000358490 | CD2     | 110 | 0.64  |
| ENSP00000348577 | RANGAP1 | 29  | 0.644 |
| ENSP00000346839 | FN1     | 27  | 0.648 |
| ENSP00000288986 | NCK1    | 5   | 0.668 |
| ENSP00000162330 | BCAR1   | 14  | 0.67  |
| ENSP00000396127 | RAN     | 29  | 0.678 |
| ENSP00000360683 | PTPN1   | 10  | 0.68  |
| ENSP00000360266 | JUN     | 46  | 0.688 |
| ENSP00000300574 | CRK     | 11  | 0.69  |



|                 |          |     |       |
|-----------------|----------|-----|-------|
| ENSP00000249636 | PIAS1    | 4   | 0.692 |
| ENSP00000255465 | CCNA1    | 10  | 0.7   |
| ENSP00000046794 | LCP2     | 92  | 0.71  |
| ENSP00000259808 | RIPK1    | 4   | 0.718 |
| ENSP00000335153 | HSP90AA1 | 26  | 0.72  |
| ENSP00000339151 | IKBKB    | 2   | 0.734 |
| ENSP00000337825 | LCK      | 132 | 0.74  |
| ENSP00000324897 | UBE2I    | 50  | 0.748 |
| ENSP00000206249 | ESR1     | 133 | 0.762 |
| ENSP00000376076 | SUMO1    | 6   | 0.778 |
| ENSP00000011653 | CD4      | 10  | 0.786 |
| ENSP00000309845 | HRAS     | 14  | 0.788 |
| ENSP00000284981 | APP      | 61  | 0.792 |
| ENSP00000372023 | CHEK2    | 23  | 0.804 |
| ENSP00000384273 | RELA     | 47  | 0.808 |
| ENSP00000363822 | AR       | 10  | 0.81  |
| ENSP00000384675 | SOS1     | 8   | 0.814 |
| ENSP00000326366 | PSEN1    | 60  | 0.826 |
| ENSP00000401303 | SHC1     | 25  | 0.828 |
| ENSP00000350283 | BRCA1    | 23  | 0.842 |
| ENSP00000350941 | SRC      | 129 | 0.842 |
| ENSP00000227507 | CCND1    | 58  | 0.864 |

|                 |        |     |       |
|-----------------|--------|-----|-------|
| ENSP00000371067 | JAK2   | 21  | 0.884 |
| ENSP00000320940 | NCOA1  | 1   | 0.888 |
| ENSP00000359206 | BTRC   | 15  | 0.89  |
| ENSP00000231509 | NR3C1  | 1   | 0.894 |
| ENSP00000262367 | CREBBP | 9   | 0.898 |
| ENSP00000244741 | CDKN1A | 8   | 0.904 |
| ENSP00000344456 | CTNNB1 | 245 | 0.928 |
| ENSP00000417281 | MDM2   | 97  | 0.932 |
| ENSP00000269571 | ERBB2  | 64  | 0.956 |
| ENSP00000344818 | UBC    | 240 | 0.984 |
| ENSP00000275493 | EGFR   | 162 | 0.998 |
